# Supplementary material for: A force field for bio-polymers in ionic liquids (BILFF) – part 1: [EMIm][OAc]/water mixtures
Source: Royal Society of Chemistry journal article supplement (doi:10.1039/d0cp04537c), 2020-12-08
Supplement: d0cp04537c1.pdf [file d0cp04537c1.pdf]

# **A Force Field for Bio-Polymers in Ionic Liquids (BILFF) – Part 1: [EMIm][OAc] / Water Mixtures**

## **Supporting Information**

Eliane Roos and Martin Brehm\*

*Institut für Chemie - Theoretische Chemie, Martin-Luther-Universität Halle-Wittenberg,  
Von-Danckelmann-Platz 4, 06120 Halle (Saale), Germany.*

\*E-mail: [Martin\\_Brehm@gmx.de](mailto:Martin_Brehm@gmx.de)

\*Website: <https://brehm-research.de/>

## Force Field Parameters

In this section, we report our optimized force field parameters for the 1-ethyl-3-methylimidazolium cation and the acetate anion. The parameters are compatible to OPLS-AA.<sup>1-3</sup> In accordance to OPLS-AA, the non-bonded Lennard-Jones and Coulomb interactions for 1-2 and 1-3 neighbors are neglected, while those for 1-4 neighbors are scaled with a factor of 0.5 (see scaling factor  $f_{ij}$  in Equation 1 below). Geometric mixing rules are applied for the Lennard-Jones interactions. We used a Coulomb and Lennard-Jones cutoff radius of 800 pm and a PPPM long-range Coulomb solver (*as implemented in LAMMPS*)<sup>4</sup> in all our simulations.

When simulating mixtures with water, the TIP4P-EW force field<sup>5</sup> (*with fixed bonds and angles*) has been applied for the water molecules. These parameters have not been modified within this work, they are used as reported in the original publication.

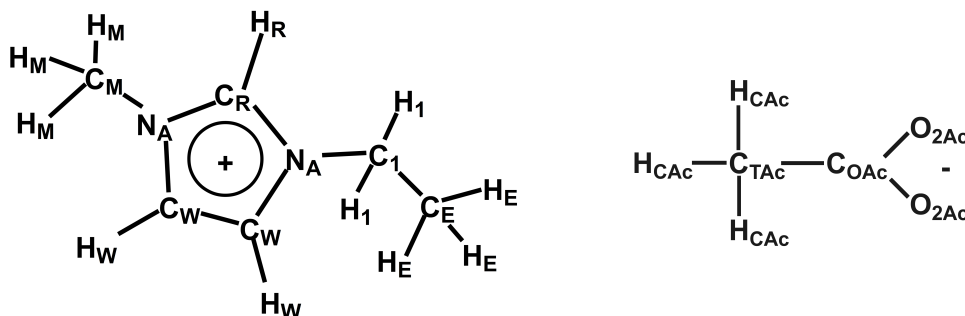

Figure S-1: Atom types in the 1-ethyl-3-methylimidazolium cation (*left*) and the acetate anion (*right*). For the corresponding atom classes, see Table S-1.

Table S-1: Atom types (*see Figure S-1*) and corresponding atom classes for the 1-ethyl-3-methylimidazolium cation (*upper part*) and the acetate anion (*lower part*). The atom types are used for the non-bonded interactions (*see Table S-2*), while the atom classes are used for the bonded interactions (*see Tables S-3 to S-6*).

| Atom Type | Atom Class |
|-----------|------------|
| CR        | CR         |
| C1        | CT         |
| CE        | CT         |
| CM        | CT         |
| CW        | CW         |
| HR        | HA         |
| HW        | HA         |
| H1        | HC         |
| HE        | HC         |
| HM        | HC         |
| NA        | NA         |
| COAc      | CO         |
| CTAc      | CT         |
| HCAc      | HC         |
| O2Ac      | O2         |

The potential energy in OPLS-AA is calculated according to the following equation:

$$\begin{aligned}
U(r^N) = & \sum_{\text{bonds}}^i \frac{k_l}{2} (l_i - l_{i,0})^2 + \sum_{\text{angles}}^i \frac{k_\theta}{2} (\theta_i - \theta_{i,0})^2 \\
& + \sum_{\text{dihedrals}}^i \left[ \frac{V_1^i}{2} [1 + \cos(\phi_i)] + \frac{V_2^i}{2} [1 - \cos(2\phi_i)] + \frac{V_3^i}{2} [1 + \cos(3\phi_i)] \right] \\
& + \sum_{i=1}^N \sum_{j=i+1}^N \left[ 4\epsilon_{ij} \left[ \left( \frac{\sigma_{ij}}{r_{ij}} \right)^{12} - \left( \frac{\sigma_{ij}}{r_{ij}} \right)^6 \right] + \frac{q_i q_j e^2}{4\pi\epsilon_0 r_{ij}} \right] f_{ij}.
\end{aligned} \tag{1}$$

Table S-2: Atomic partial charges  $q$  (total ion charge  $\pm 0.82$ ) and Lennard-Jones parameters  $\sigma$  and  $\epsilon$  for the 1-ethyl-3-methylimidazolium cation (*upper part*) and the acetate anion (*lower part*). For the atom types, see Figure S-1.

| Atom Type | $q$    | $\sigma$<br>/ Å | $\epsilon$<br>/ kJ mol <sup>-1</sup> |
|-----------|--------|-----------------|--------------------------------------|
| C1        | -0.147 | 3.34            | 0.276                                |
| CE        | -0.042 | 3.34            | 0.276                                |
| CM        | -0.147 | 3.34            | 0.276                                |
| CR        | -0.096 | 3.38            | 0.293                                |
| CW        | -0.113 | 3.38            | 0.293                                |
| H1        | +0.116 | 2.38            | 0.126                                |
| HE        | +0.055 | 2.38            | 0.126                                |
| HM        | +0.116 | 2.38            | 0.126                                |
| HR        | +0.165 | 1.43            | 0.126                                |
| HW        | +0.150 | 1.62            | 0.126                                |
| NA        | +0.134 | 3.10            | 0.711                                |
| COAc      | +0.575 | 3.57            | 0.439                                |
| CTAc      | -0.230 | 3.34            | 0.276                                |
| HCAc      | +0.049 | 2.38            | 0.126                                |
| O2Ac      | -0.656 | 2.96            | 0.879                                |

**Please note:** The force constants  $k$  for the bonds and angles and the torsion parameters  $V$  do **not** include the factor  $\frac{1}{2}$  from the potential energy equation (*see Equation 1*).

Table S-3: Bond equilibrium lengths  $l_0$  and force constants  $k_l$  for the 1-ethyl-3-methylimidazolium cation and the acetate anion. For the atom classes, see Table S-1.

| Bond Type | $l_0$<br>/ Å | $k_l$<br>/ kJ mol <sup>-1</sup> Å <sup>-2</sup> |
|-----------|--------------|-------------------------------------------------|
| CO-O2     | 1.284        | 4457                                            |
| CR-HA     | 1.089        | 2570                                            |
| CT-CO     | 1.554        | 1820                                            |
| CT-CT     | 1.532        | 2097                                            |
| CT-HC     | 1.099        | 3013                                            |
| CW-CW     | 1.374        | 4019                                            |
| CW-HA     | 1.085        | 2943                                            |
| NA-CR     | 1.356        | 3636                                            |
| NA-CT     | 1.485        | 2078                                            |
| NA-CW     | 1.403        | 2775                                            |

Table S-4: Angle equilibrium values  $\theta_0$  and force constants  $k_\theta$  for the 1-ethyl-3-methylimidazolium cation and the acetate anion. For the atom classes, see Table S-1.

| Angle Type | $\theta_0$<br>/ Deg | $k_\theta$<br>/ kJ mol <sup>-1</sup> rad <sup>-2</sup> |
|------------|---------------------|--------------------------------------------------------|
| O2-CO-O2   | 127.2               | 790.6                                                  |
| CT-CO-O2   | 117.7               | 524.4                                                  |
| NA-CR-HA   | 126.2               | 244.9                                                  |
| NA-CR-NA   | 107.6               | 831.0                                                  |
| CO-CT-HC   | 110.3               | 303.6                                                  |
| CT-CT-HC   | 111.4               | 338.6                                                  |
| HC-CT-HC   | 109.2               | 308.0                                                  |
| NA-CT-CT   | 110.9               | 532.7                                                  |
| NA-CT-HC   | 107.2               | 411.7                                                  |
| CW-CW-HA   | 131.7               | 236.7                                                  |
| NA-CW-CW   | 107.0               | 805.7                                                  |
| NA-CW-HA   | 120.8               | 263.0                                                  |
| CR-NA-CW   | 110.0               | 842.8                                                  |
| CT-NA-CR   | 124.9               | 370.2                                                  |
| CT-NA-CW   | 125.2               | 367.8                                                  |

Table S-5: Torsion parameters  $V_n$  for the 1-ethyl-3-methylimidazolium cation and the acetate anion. For the atom classes, see Table S-1.

| Torsion Angle Type | $V_1$                  | $V_2$                  | $V_3$                  |
|--------------------|------------------------|------------------------|------------------------|
|                    | / kJ mol <sup>-1</sup> | / kJ mol <sup>-1</sup> | / kJ mol <sup>-1</sup> |
| CT-NA-CR-NA        | 0.000                  | 19.460                 | 0.000                  |
| CT-NA-CR-HA        | 0.000                  | 19.460                 | 0.000                  |
| CW-NA-CR-NA        | 0.000                  | 39.000                 | 0.000                  |
| CW-NA-CR-HA        | 0.000                  | 19.460                 | 0.000                  |
| CR-NA-CT-HC        | 0.000                  | 0.000                  | 0.000                  |
| CR-NA-CT-CT        | 10.540                 | 0.000                  | 0.000                  |
| CW-NA-CT-HC        | 0.000                  | 0.000                  | 0.519                  |
| CW-NA-CT-CT        | 14.300                 | -12.200                | -1.590                 |
| CR-NA-CW-HA        | 0.000                  | 12.550                 | 0.000                  |
| CR-NA-CW-CW        | 0.000                  | 25.000                 | 0.000                  |
| CT-NA-CW-HA        | 0.000                  | 12.550                 | 0.000                  |
| CT-NA-CW-CW        | 0.000                  | 12.550                 | 0.000                  |
| HC-CT-CT-HC        | 0.000                  | 0.000                  | 1.255                  |
| NA-CT-CT-HC        | 0.000                  | 0.000                  | 0.367                  |
| HC-CT-CO-O2        | 0.000                  | 0.000                  | 0.000                  |
| HA-CW-CW-HA        | 0.000                  | 30.000                 | 0.000                  |
| NA-CW-CW-HA        | 0.000                  | 44.980                 | 0.000                  |
| NA-CW-CW-NA        | 0.000                  | 65.000                 | 0.000                  |

**Please note:** Improper torsions are handled as torsions; there is no extra term for impropers in the potential energy equation.

Table S-6: Improper torsions for the 1-ethyl-3-methylimidazolium cation and the acetate anion. For the atom classes, see Table S-1.

| Improper Torsion Type | $V_1$                  | $V_2$                  | $V_3$                  |
|-----------------------|------------------------|------------------------|------------------------|
|                       | / kJ mol <sup>-1</sup> | / kJ mol <sup>-1</sup> | / kJ mol <sup>-1</sup> |
| NA-CW-CW-HA           | 0.000                  | 8.200                  | 0.000                  |
| CR-CW-NA-CT           | 0.000                  | 8.370                  | 0.000                  |
| CR-CW-NA-HA           | 0.000                  | 8.370                  | 0.000                  |
| NA-NA-CR-CT           | 0.000                  | 9.200                  | 0.000                  |
| NA-NA-CR-HA           | 0.000                  | 9.900                  | 0.000                  |
| CT-O2-CO-O2           | 0.000                  | 90.000                 | 0.000                  |

## Radial Distribution Functions

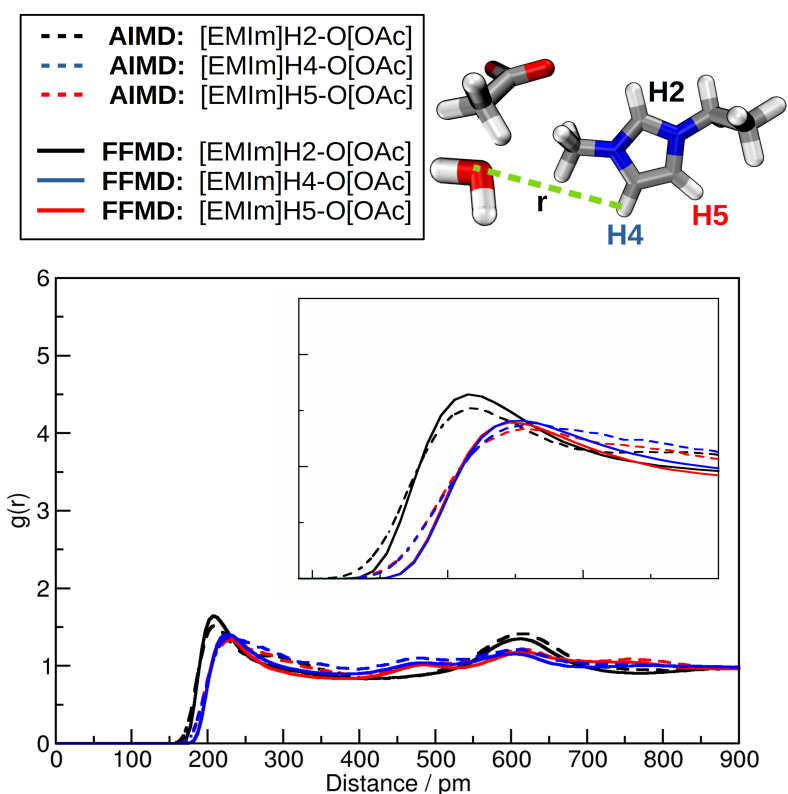

Figure S-2: Comparison of the radial distribution functions (RDFs) of the AIMD and the force field MD using BILFF between the hydrogen atoms H2, H4 and H5 of [EMIm]<sup>+</sup> and the oxygen atom of water in the aqueous ionic liquid.

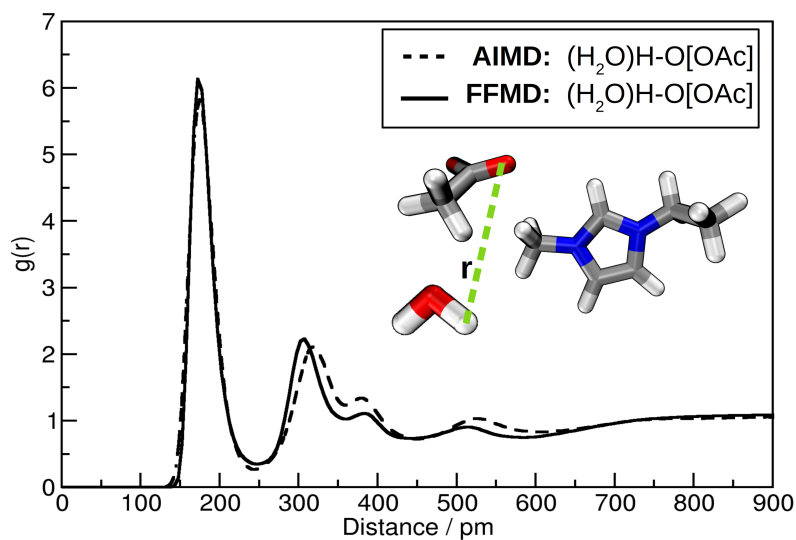

Figure S-3: Comparison of the radial distribution functions (RDFs) of the AIMD and the force field MD using BILFF between the hydrogen atoms of water and the oxygen atoms of acetate in the aqueous ionic liquid.

## Combined Distribution Functions

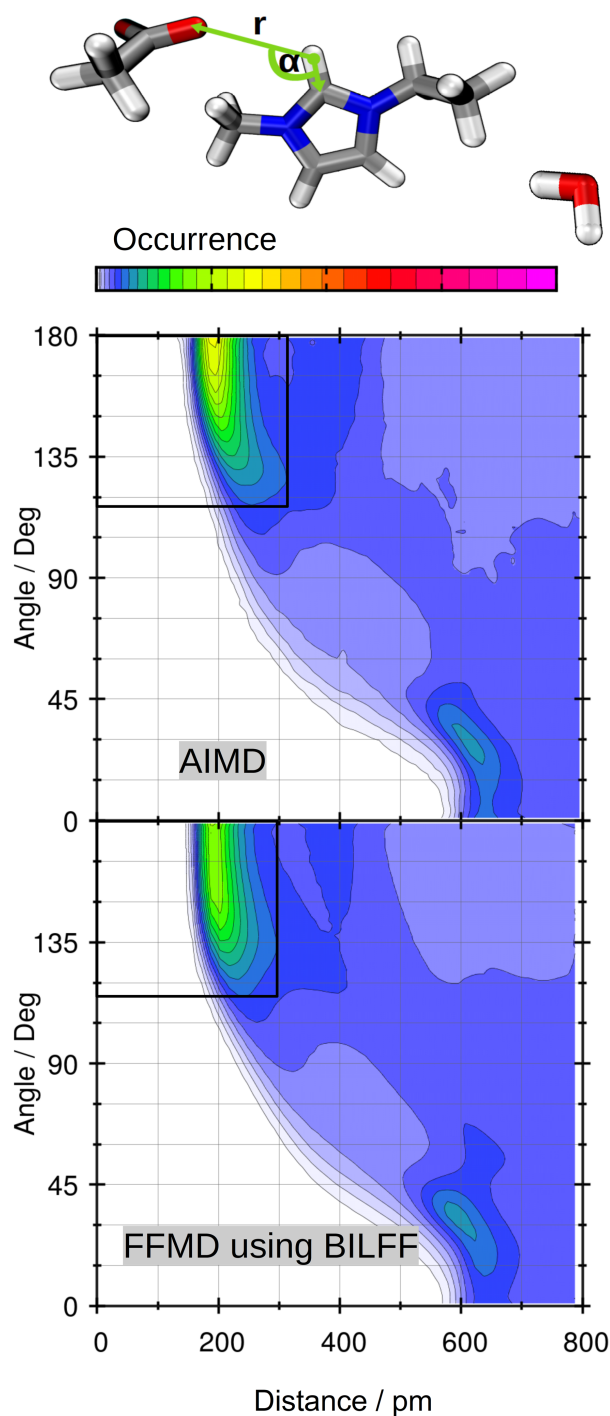

Figure S-4: Combined distribution functions (CDFs) from the AIMD (*upper panel*) and the force-field MD using BILFF (*lower panel*) between the hydrogen atom H2 of [EMIm]<sup>+</sup> and the acetate oxygen in the aqueous ionic liquid with marked geometric criterion for the dimer autocorrelation function of this hydrogen bond (*black rectangle*).

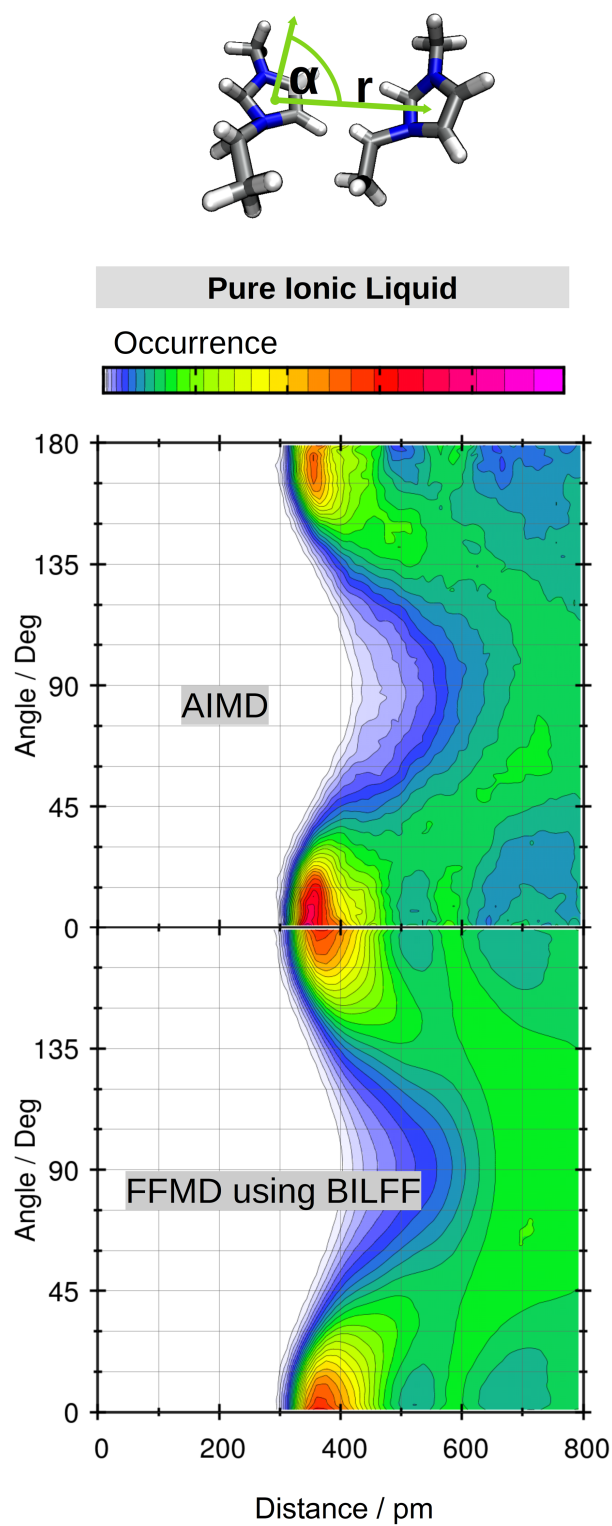

Figure S-5: Combined distribution functions (CDFs) from the AIMD (*upper panel*) and the force field MD using BILFF (*lower panel*) between the ring centers of two [EMIm]<sup>+</sup> cations in the pure ionic liquid.



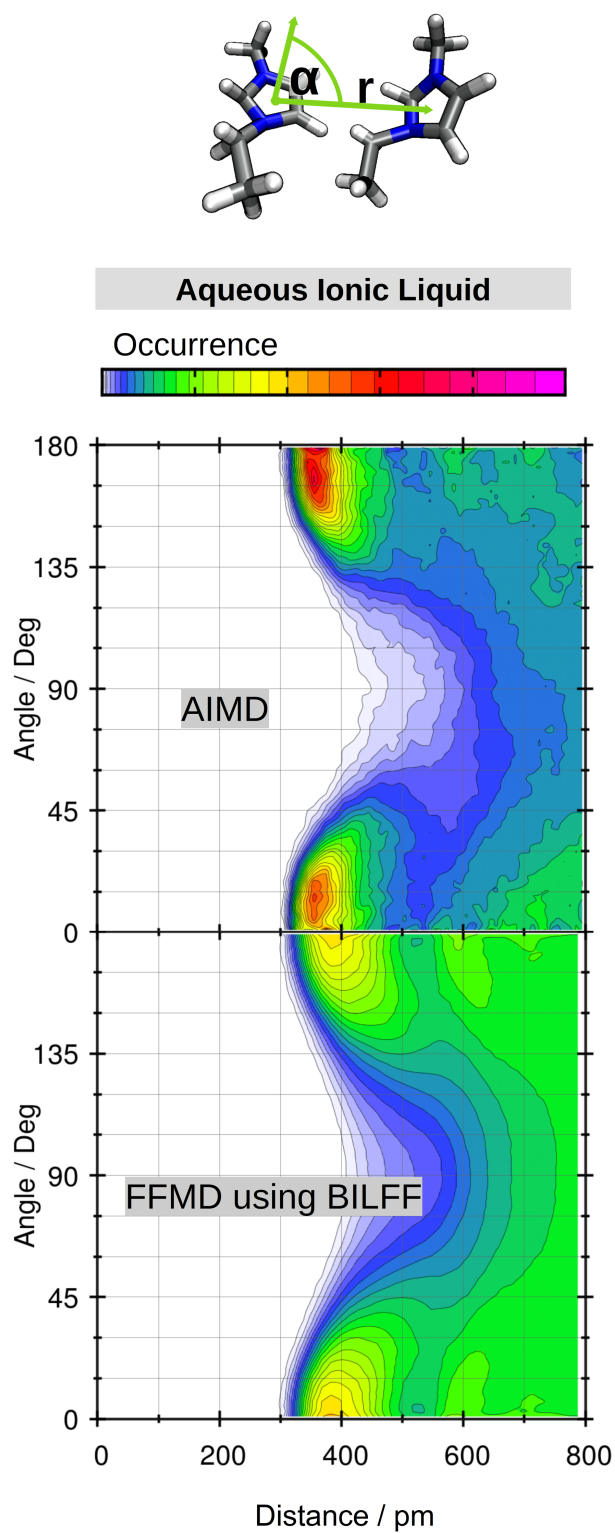

Figure S-6: Combined distribution functions (CDFs) from the AIMD (*upper panel*) and the force field MD using BILFF (*lower panel*) between the ring centers of two [EMIm]<sup>+</sup> cations in the aqueous ionic liquid.

## Arrhenius Plot of the Diffusion Coefficients

Figures S-7 and Fig. S-8 show the Arrhenius plots of the calculated diffusion coefficients at different temperatures of pure and aqueous [EMIm][OAc]. The linear shape in the logarithmic–reciprocal plots indicates an Arrhenius behavior of the diffusion coefficients, which is frequently observed for ionic liquids.<sup>6</sup>

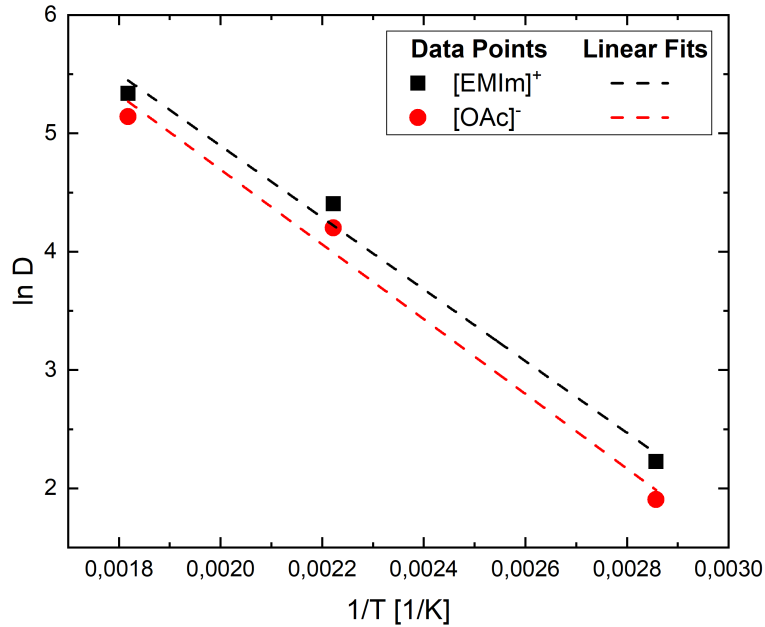

Figure S-7: Arrhenius plot of the calculated diffusion coefficients from our FFMD simulations of the pure system using BILFF.

Table S-7: Regression parameters of the linear regression  $y = m \cdot x + n$  in the corresponding Arrhenius plots, Fig. S-7 and S-8.

| System  | Parameter | $[EMIm]^+$       | $[OAc]^-$        | $H_2O$           |
|---------|-----------|------------------|------------------|------------------|
| pure    | n         | $10.96 \pm 0.71$ | $11.01 \pm 0.82$ | –                |
|         | m         | $-3032 \pm 304$  | $-3159 \pm 350$  | –                |
|         | $R^2$     | 0.980            | 0.976            | –                |
| aqueous | n         | $11.47 \pm 0.59$ | $11.50 \pm 0.22$ | $12.40 \pm 0.15$ |
|         | m         | $-2917 \pm 252$  | $-2928 \pm 95$   | $-2926 \pm 64$   |
|         | $R^2$     | 0.985            | 0.998            | 0.999            |

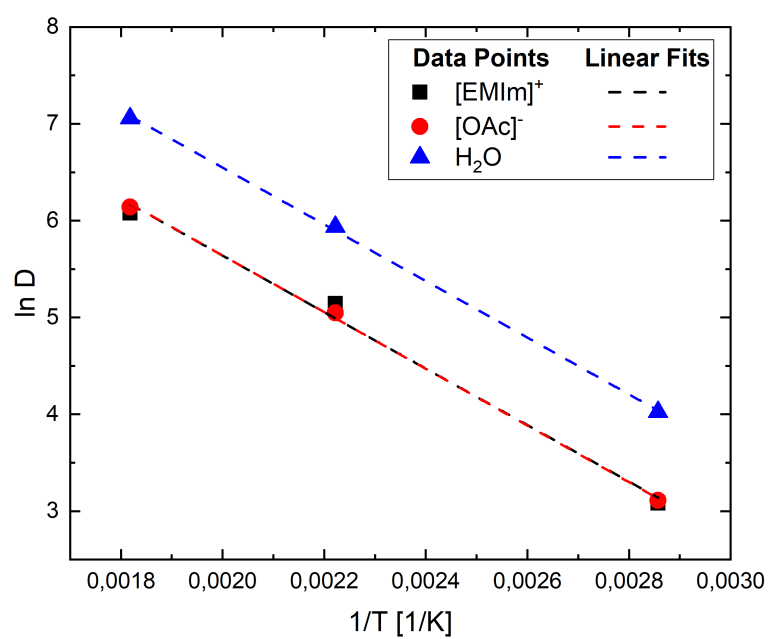

Figure S-8: Arrhenius plot of the calculated diffusion coefficients from our FFMD simulations of the aqueous system using BILFF.

## Diffusive Regime

The double logarithmic plot of the mean squared displacement (MSD) over the correlation depth (see Fig. S-9) shows whether the dynamics of a system is diffusive or subdiffusive.<sup>7,8</sup> For both the pure and the aqueous system, a convergence towards a slope of 1 with increasing correlation depth is recognizable. At a temperature of 350 K, a slope of 1 (and thus a diffusive dynamics) is only reached at large correlation depths of around 1 ns in the pure IL.

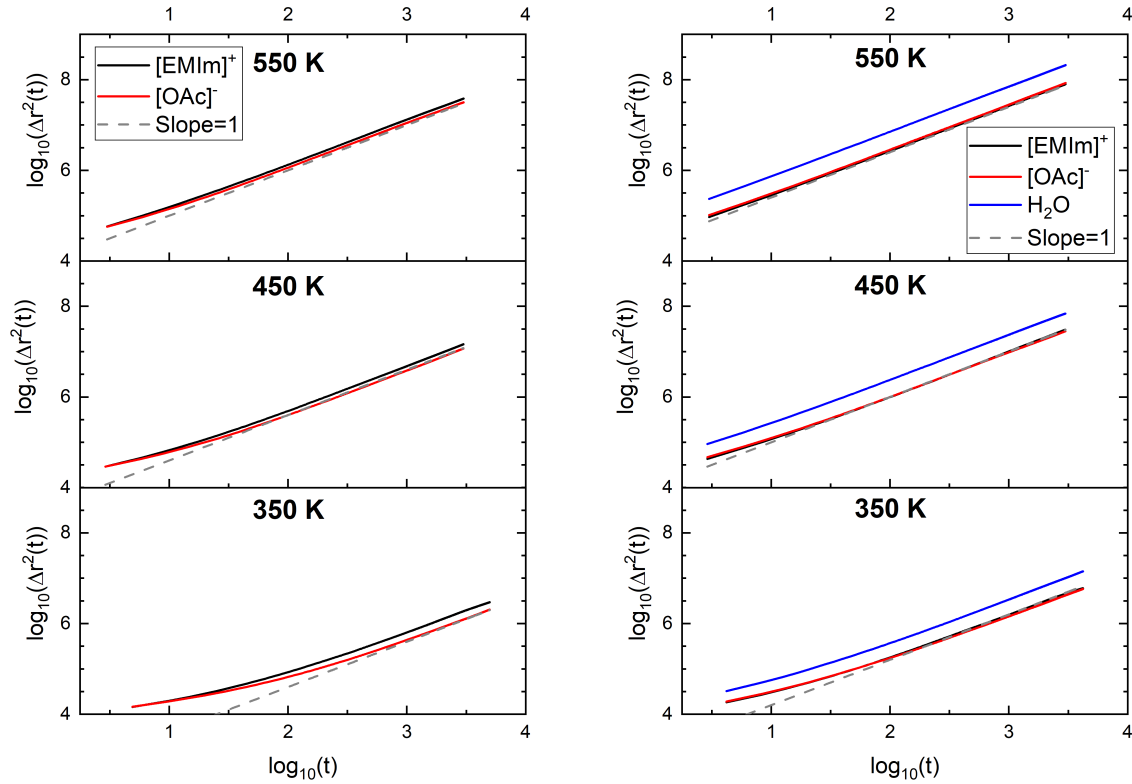

Figure S-9: The double logarithmic plot of the mean squared displacement (MSD) over the correlation depth of the pure (*left*) and aqueous (*right*) system at different temperatures. The dashed lines indicate a slope of 1, *i. e.*, diffusive behavior.

## References

- (1) Jorgensen, W. L.; Maxwell, D. S.; Tirado-Rives, J. Development and Testing of the OPLS All-Atom Force Field on Conformational Energetics and Properties of Organic Liquids. *J. Am. Chem. Soc.* **1996**, *118*, 11225–11236.
- (2) Ponder, J. W.; Case, D. A. *Protein Simulations*; Advances in Protein Chemistry; Elsevier, 2003; Vol. 66; pp 27–85.
- (3) Sambasivarao, S. V.; Acevedo, O. Development of OPLS-AA Force Field Parameters for 68 Unique Ionic Liquids. *J. Chem. Theory Comput.* **2009**, *5*, 1038–1050.
- (4) Plimpton, S. Fast Parallel Algorithms for Short-Range Molecular Dynamics. *J. Comp. Phys.* **1995**, *117*, 1–19.
- (5) Horn, H. W.; Swope, W. C.; Pitner, J. W.; Madura, J. D.; Dick, T. J.; Hura, G. L.; Head-Gordon, T. Development of an improved four-site water model for biomolecular simulations: TIP4P-Ew. *J. Chem. Phys.* **2004**, *120*, 9665–9678.
- (6) Tokuda, H.; Hayamizu, K.; Ishii, K.; Susan, M. A. B. H.; Watanabe, M. Physicochemical Properties and Structures of Room Temperature Ionic Liquids. 1. Variation of Anionic Species. *J. Phys. Chem. B* **2004**, *108*, 16593–16600.
- (7) Del Pópolo, M. G.; Voth, G. A. On the Structure and Dynamics of Ionic Liquids. *J. Phys. Chem. B* **2004**, *108*, 1744–1752.
- (8) Perkins, S. L.; Painter, P.; Colina, C. M. Molecular Dynamic Simulations and Vibrational Analysis of an Ionic Liquid Analogue. *J. Phys. Chem. B* **2013**, *117*, 10250–10260.
